# Supplementary material for: Photoreceptor Cells Constitutively Express IL-35 and Promote Ocular Immune Privilege
Source: MDPI journal article supplement (doi:10.3390/ijms23158156), 2022-07-24
Supplement: s1 [file s1]

# S1A.

## Locations of PCR primers.

KI allele PCR

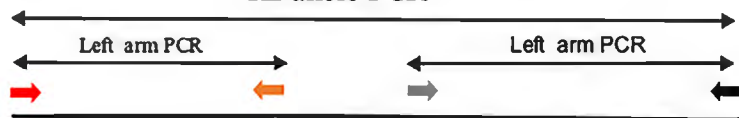

## Sizes of PCR products.

PCR product of the KI allele (3.814k) with primer set IL12a E2-sc-F (red arrow) and IL12a E2-right-R (dark arrow) covering the KI cassette and the HR junctions are sequenced and confirmed to be correct on two F0 mice: CH12-20 and CH12-42

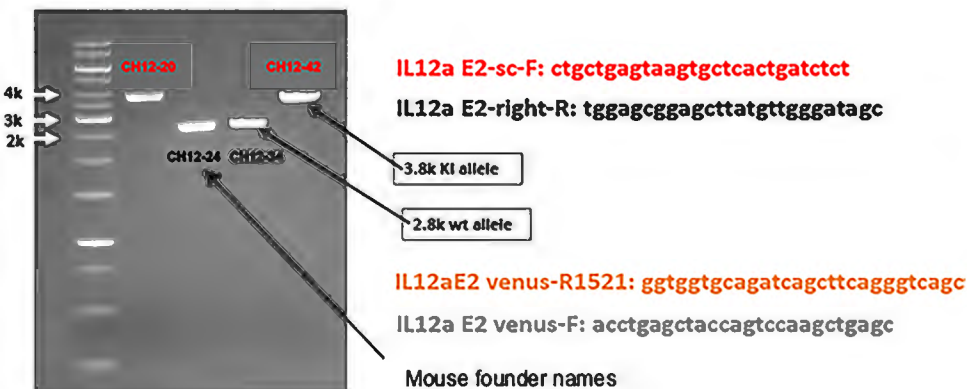

# S1B.

## Left Arm PCRs

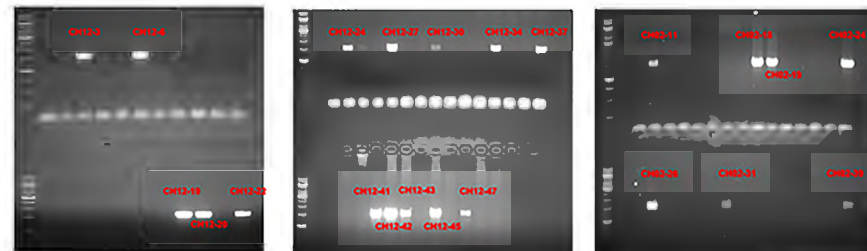

Primer set: IL12a E2-sc-F + IL12aE2 venus-R1521 (PCR amplicon=1521bp) PCR enzyme: GXL

Total 22 pups are positive on left arm: CH12- 3, 6, 19, 20, 22, 24, 27, 30, 34, 37, 41, 42, 43, 45, 47, CH02- 11, 18, 19, 24, 26, 31, 39

## Right Arm PCRs

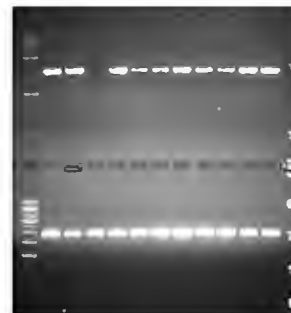

All F0 positive for the left arm HR event are also positive for the right arm HR event, except CH12-19:  
 CH12- 3, 6, 19, 20, 22, 24, 27, 30, 34, 37, 41, 42, 43, 45, 47  
 CH02- 11, 18, 19, 24, 26, 31, 39

Primer set: IL12a E2 venus-F + IL12a E2-right-R, 1845bp PCR enzyme: GXL
